# Supplementary material for: Efficient multi-scale Gaussian process regression for massive remote sensing data with satGP v0.1.2
Source: Copernicus journal article supplement (doi:10.5194/gmd-13-3439-2020), 2020-07-31
Supplement: Supplementary file [file gmd-13-3439-2020-supplement-title-page.pdf › gmd-13-3439-2020-supplement-title-page.pdf]

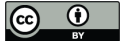

## *Supplement of*

# **Efficient multi-scale Gaussian process regression for massive remote sensing data with satGP v0.1.2**

**Jouni Susiluoto et al.**

*Correspondence to:* Jouni Susiluoto ([jsusiluo@mit.edu](mailto:jsusiluo@mit.edu))

- [gmd-13-3439-2020-supplement-title-page.pdf](#)
- [satGP\\_v0.2.1](#)
  - LICENSE
  - README
  - `calibrate.h`
  - `covariance_functions.h`
  - `create_daylist.py`
  - `data`
    - \* `meanfunction_fields_susiluoto_et_al_2020`
    - \* `oco2_v9`
  - `debug.sh`
  - `experiments`
  - `gaussian_proc.h`
  - `gp.c`
  - `gpconfig.h`
  - `gpopt.h`
  - `gproc.sh`
  - `gpstructs.h`
  - `gputils.h`
  - `mcmc.h`
  - `mean_functions.h`
  - `meson.build`
  - `plotting`
    - \* `areas.py`

- \* `plot_field_and_unc.py`
- \* `plot_gp_calibration.py`
- \* `plot_mean_function_betas.py`
- \* `plot_mf_timeseries_with_data.py`

The copyright of individual parts of the supplement might differ from the CC BY 4.0 License.
